# Supplementary material for: Properdin oligomers adopt rigid extended conformations supporting function
Source: eLife journal article supplement (doi:10.7554/elife.63356), 2021-01-22

A

| Sample | Concentration<br>[mg·mL <sup>-1</sup> ] | I(0) [1/cm]           | MW <sub>exp</sub><br>(kDa) | MW <sub>nom</sub><br>(kDa) | R <sub>g</sub><br>[Å] | Dmax<br>[Å] |
|--------|-----------------------------------------|-----------------------|----------------------------|----------------------------|-----------------------|-------------|
| FP2    | 1.92                                    | 0.16                  | 112                        | 110                        | 81+/- 1               | 234         |
| FP3    | 0.47                                    | 4.61E-02<br>+/- 4E-04 | 135                        | 165                        | 102+/- 1              | 245         |
| FP4    | 0.37                                    | 5.47E-02<br>+/- 4E-04 | 208                        | 220                        | 126+/- 1              | 356         |

B

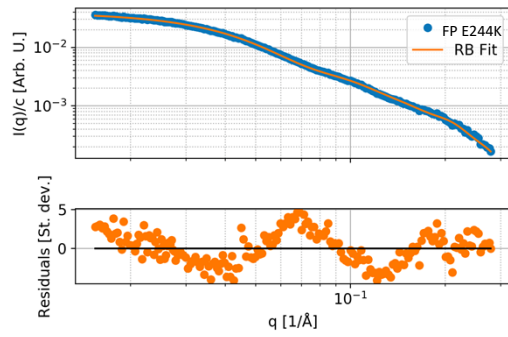

C

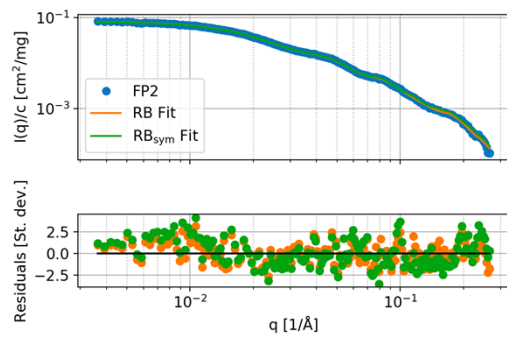

D

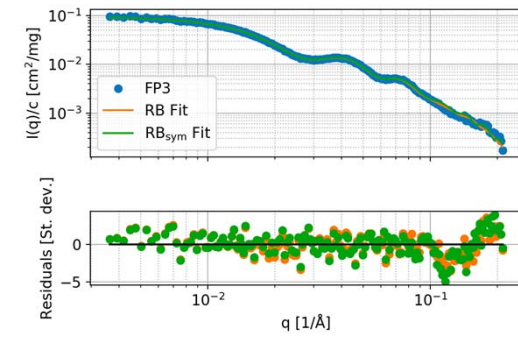

E

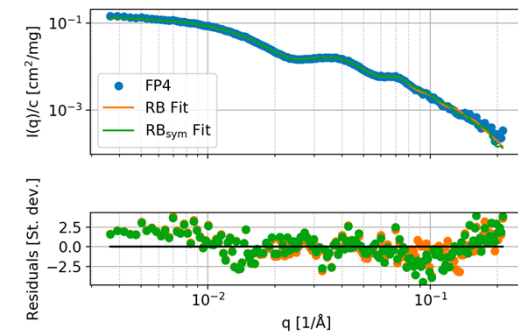

F

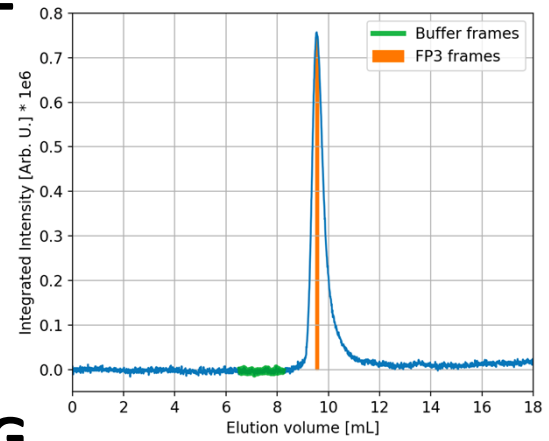

G

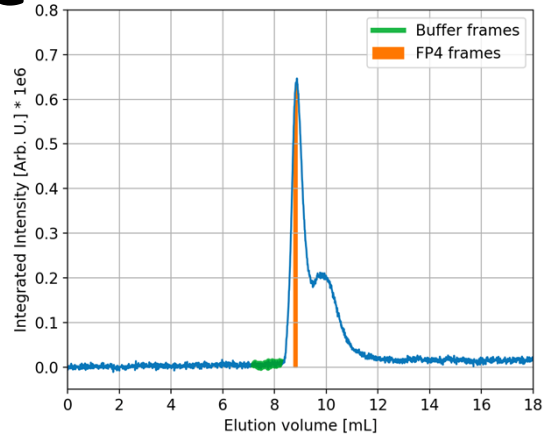

H

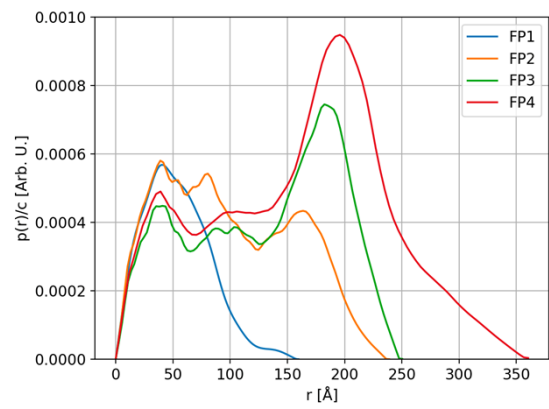

Supplement: supp [file elife-63356-supp-v1.zip]
