# Supplementary material for: Properdin oligomers adopt rigid extended conformations supporting function
Source: eLife journal article supplement (doi:10.7554/elife.63356), 2021-01-22
Supplement: supp [file elife-63356-supp-v1.zip]

|                          |     |        |        |        |        |        |
|--------------------------|-----|--------|--------|--------|--------|--------|
|                          | 1   | 10     | 20     | 30     | 40     |        |
| <i>Petro. marinus</i>    | ... | VEAAW  | LWLPV  | IAALV  | STGAAQ | ...    |
| <i>Homo sapiens</i>      | M   | ITEGA  | QAAPR  | LLLPL  | LLLTLP | ATG... |
| <i>Camar. parvulus</i>   | ... | MAAPG  | LLLVL  | GLLTH  | SGSPGH | GAATP  |
| <i>Salmo trutta</i>      | ... | MVQL   | LLWTS  | LVLLMT | TVKESV | ...    |
| <i>Python bivittatus</i> | ME  | ILGL   | KRFQ   | FLLV   | CVWFVS | LEAPAE |
| <i>Xenopus laevis</i>    | ... | MSV    | VRVA   | LLLAL  | GALL   | ...    |
|                          | 50  | 60     | 70     | 80     | 90     |        |
| <i>Petro. marinus</i>    | L   | LLGHKT | TSQEAC | CRNPT  | FGF    | ...    |
| <i>Homo sapiens</i>      | L   | GGG    | VSVED  | CCCLN  | TAFAY  | QKRSG  |
| <i>Camar. parvulus</i>   | L   | GEE    | PLPLAD | CCCLN  | HAYGY  | RLRPH  |
| <i>Salmo trutta</i>      | W   | LLGE   | VTMTD  | CCCLN  | PHYGY  | I      |
| <i>Python bivittatus</i> | L   | GAE    | ISKED  | CCCLN  | HQYGF  | QLKQG  |
| <i>Xenopus laevis</i>    | L   | GEG    | VSE    | DCCLN  | I      | KYSF   |
|                          | 100 | 110    | 120    | 130    |        |        |
| <i>Petro. marinus</i>    | G   | VSSRA  | KVC    | I      | G      | ...    |
| <i>Homo sapiens</i>      | G   | SQLR   | RYRR   | CV     | GW     | ...    |
| <i>Camar. parvulus</i>   | G   | TQRR   | RGR    | SRGH   | GGHAG  | ...    |
| <i>Salmo trutta</i>      | G   | VSSRR  | RRRC   | Q      | G      | ...    |
| <i>Python bivittatus</i> | G   | VQR    | RR     | DRV    | CTG    | ...    |
| <i>Xenopus laevis</i>    | G   | VQR    | RR     | DRV    | CTG    | ...    |
|                          | 140 | 150    | 160    | 170    | 180    |        |
| <i>Petro. marinus</i>    | W   | GSWG   | QW     | SA     | CSVTC  | EA     |
| <i>Homo sapiens</i>      | W   | SGWG   | PW     | EP     | CSVTC  | SK     |
| <i>Camar. parvulus</i>   | W   | GPWS   | PW     | GR     | CSVTC  | GRG    |
| <i>Salmo trutta</i>      | W   | SGWG   | QW     | P      | CSVTC  | KN     |
| <i>Python bivittatus</i> | W   | SEWS   | NW     | KP     | CSVTC  | LT     |
| <i>Xenopus laevis</i>    | W   | SSWS   | AW     | T      | V      | CSVTC  |
|                          | 190 | 200    | 210    | 220    | 230    |        |
| <i>Petro. marinus</i>    | G   | QICPT  | HGAW   | GS     | WLS    | WGECS  |
| <i>Homo sapiens</i>      | Q   | QVCP   | THGAW  | AT     | WGP    | WT     |
| <i>Camar. parvulus</i>   | A   | GTCP   | VAGAW  | PW     | GP     | WGP    |
| <i>Salmo trutta</i>      | D   | RICPT  | HGAW   | GS     | NW     | D      |
| <i>Python bivittatus</i> | K   | QICPT  | HGAW   | GS     | NW     | D      |
| <i>Xenopus laevis</i>    | Q   | QVCP   | THGAW  | GS     | NW     | D      |
|                          | 240 | 250    | 260    | 270    | 280    |        |
| <i>Petro. marinus</i>    | S   | QCPG   | ASQ    | DT     | G      | P      |
| <i>Homo sapiens</i>      | K   | PCPG   | LAYE   | Q      | RRCT   | G      |
| <i>Camar. parvulus</i>   | A   | PCPG   | NGAD   | S      | EPC    | P      |
| <i>Salmo trutta</i>      | D   | ECPL   | GLS    | N      | T      | R      |
| <i>Python bivittatus</i> | M   | PCPG   | ASQ    | ES     | R      | S      |
| <i>Xenopus laevis</i>    | R   | PCG    | QES    | R      | Q      | V      |
|                          | 290 | 300    | 310    | 320    | 330    |        |
| <i>Petro. marinus</i>    | P   | PAPRY  | GGRL   | C      | P      | G      |
| <i>Homo sapiens</i>      | P   | VPQ    | HGGP   | FC     | AGD    | ...    |
| <i>Camar. parvulus</i>   | P   | SPKH   | GGRL   | C      | EGP    | ...    |
| <i>Salmo trutta</i>      | P   | APKH   | GGRL   | C      | EGP    | ...    |
| <i>Python bivittatus</i> | P   | APKH   | GGRL   | C      | EGP    | ...    |
| <i>Xenopus laevis</i>    | P   | APKH   | GGRL   | C      | EGP    | ...    |
|                          | 340 | 350    | 360    | 370    |        |        |
| <i>Petro. marinus</i>    | P   | YENR   | CRPRV  | GKQ    | TMQR   | ICM    |
| <i>Homo sapiens</i>      | M   | KSI    | ISCQE  | I      | P      | G      |
| <i>Camar. parvulus</i>   | W   | GDI    | ISCRA  | V      | G      | Q      |
| <i>Salmo trutta</i>      | R   | GK     | IRCR   | K      | I      | G      |
| <i>Python bivittatus</i> | S   | YNI    | K      | CDD    | I      | T      |
| <i>Xenopus laevis</i>    | Q   | ENI    | A      | CST    | KV     | GT     |
|                          | 380 | 390    | 400    | 410    | 420    |        |
| <i>Petro. marinus</i>    | E   | LKVK   | NP     | EW     | EW     | GS     |
| <i>Homo sapiens</i>      | G   | ...    | ...    | ...    | ...    | ...    |
| <i>Camar. parvulus</i>   | G   | ...    | ...    | ...    | ...    | ...    |
| <i>Salmo trutta</i>      | G   | ...    | ...    | ...    | ...    | ...    |
| <i>Python bivittatus</i> | G   | ...    | ...    | ...    | ...    | ...    |
| <i>Xenopus laevis</i>    | E   | ...    | ...    | ...    | ...    | ...    |
|                          | 430 | 440    | 450    | 460    |        |        |
| <i>Petro. marinus</i>    | N   | I      | P      | IT     | FWGT   | PAEE   |
| <i>Homo sapiens</i>      | G   | EKN    | V      | TFWGR  | PL     | PR     |
| <i>Camar. parvulus</i>   | G   | VAP    | V      | FWGR   | PL     | PR     |
| <i>Salmo trutta</i>      | K   | V      | KAY    | FDGT   | P      | FAN    |
| <i>Python bivittatus</i> | R   | D      | N      | VT     | FWG    | K      |
| <i>Xenopus laevis</i>    | L   | V      | D      | V      | FFS    | G      |
