# Supplementary figures and images for: Properdin oligomers adopt rigid extended conformations supporting function
Source: eLife journal article supplement (doi:10.7554/elife.63356), 2021-01-22

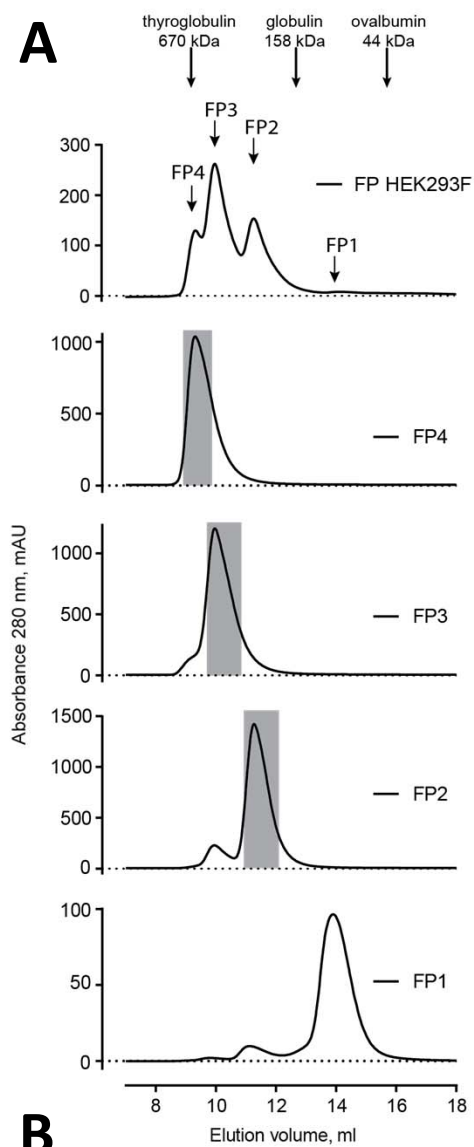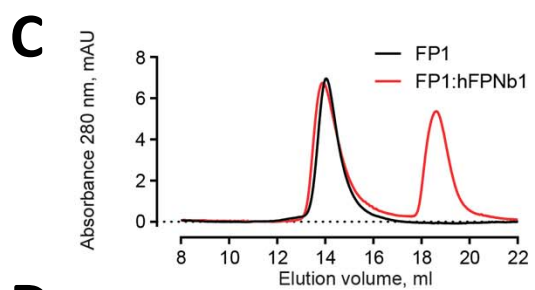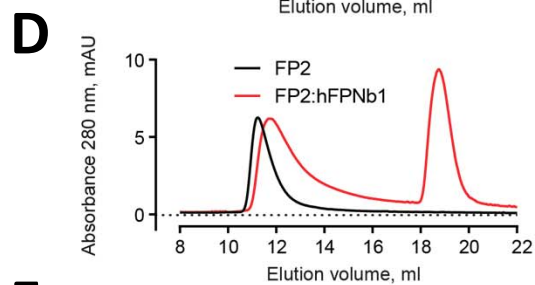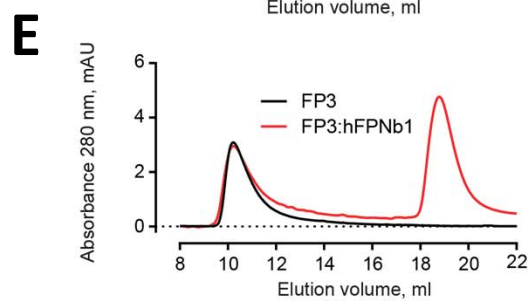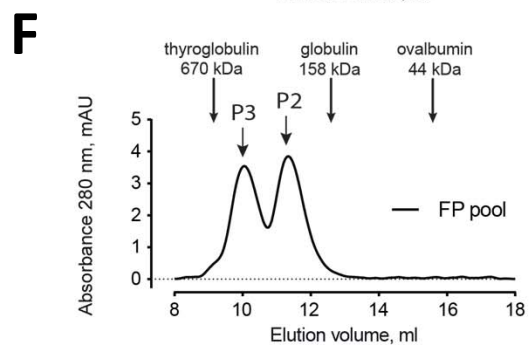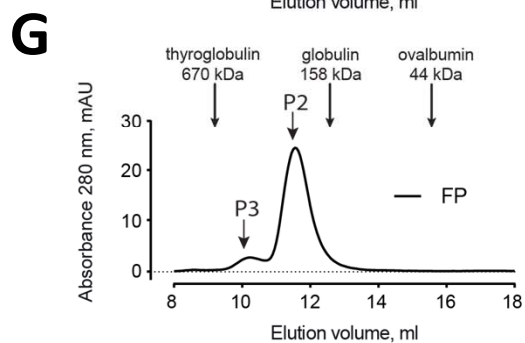

Supplement: supp [file elife-63356-supp-v1.zip]

**A**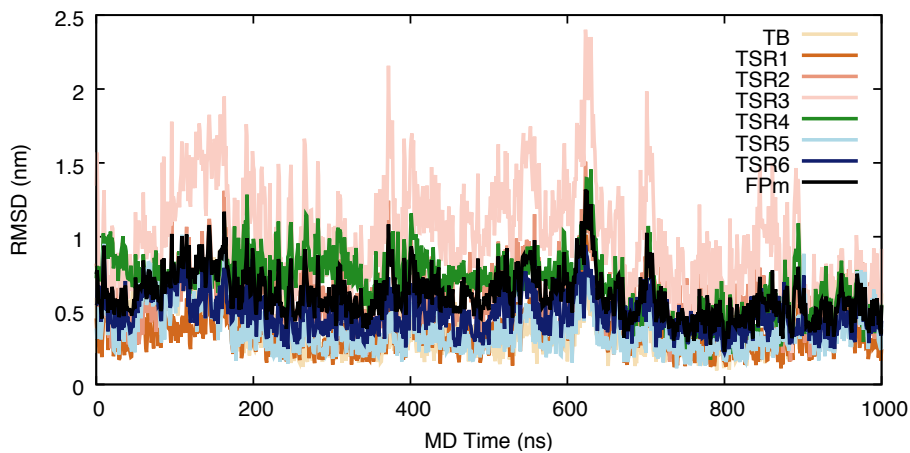**B**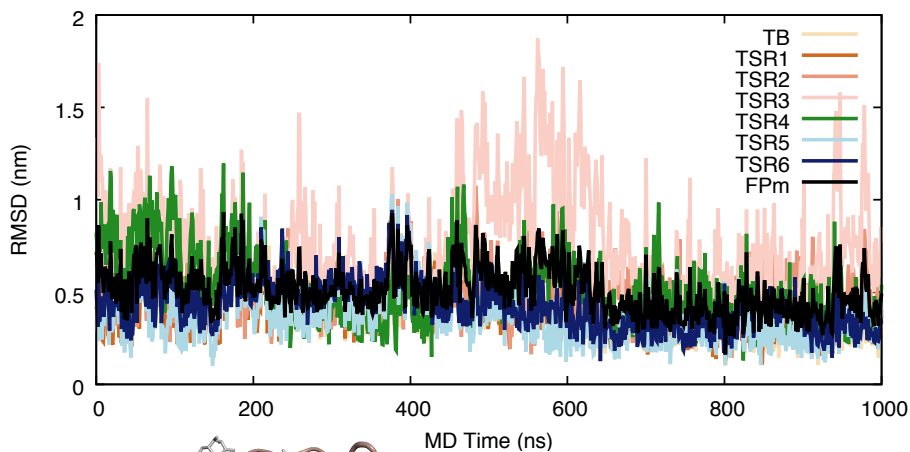**C**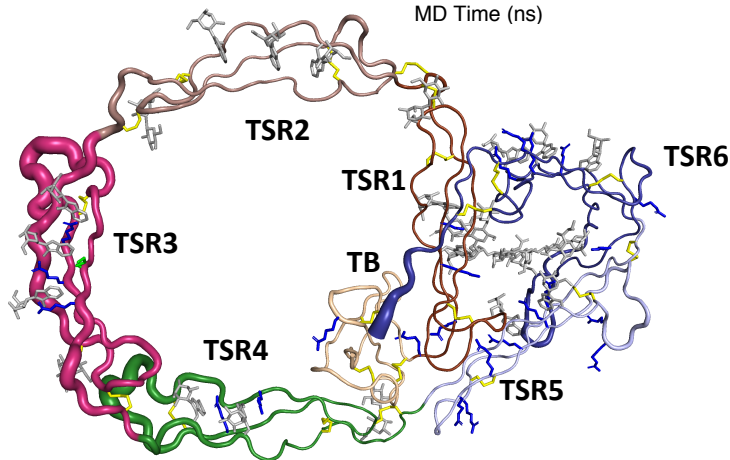**D****TSR3**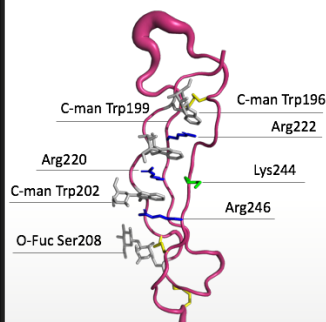**E****TSR2**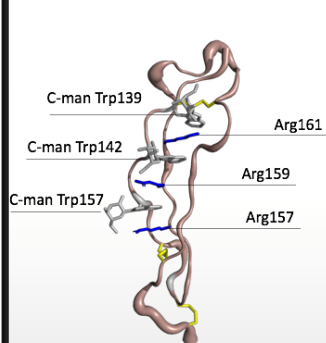**F****TSR4**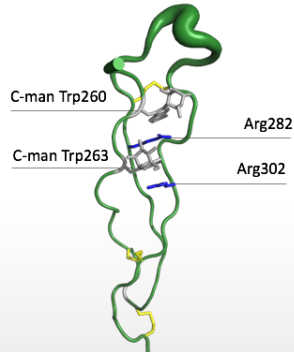

Supplement: supp [file elife-63356-supp-v1.zip]
